# Supplementary material for: Palladium catalyzed oxidation of renewable terpenes with molecular oxygen: oxidation of α-bisabolol under chloride-free nonacidic conditions
Source: Royal Society of Chemistry journal article supplement (doi:10.1039/c5ra10563c), 2015-01-01
Supplement: c5ra10563c1.pdf [file c5ra10563c1.pdf]

# **Palladium catalyzed oxidation of renewable terpenes with molecular oxygen: oxidation of $\alpha$ -bisabolol under chloride-free nonacidic conditions**

**Luciana A. Parreira<sup>ab</sup>, Luciano Menini<sup>c</sup>, Andressa Martins da Cunha<sup>c</sup> and Elena V.  
Gusevskaya<sup>a\*</sup>**

*<sup>a</sup> Departamento de Química, Universidade Federal de Minas Gerais, 31270-901, Belo Horizonte, MG, Brazil, Fax: (+55)-31-3409-5700;  
phone (+55)-31-3409-5741; e-mail: elena@ufmg.br*

*<sup>b</sup> Departamento de Química e Física, Campus de Alegre – CCA, Universidade Federal do Espírito Santo, 29500-000 Caixa Postal 16,  
Alegre, ES, Brazil*

*<sup>c</sup> Campus de Alegre Instituto Federal de Educação, Ciência e Tecnologia do Espírito Santo, 29500-000 Caixa Postal 47, Alegre, ES, Brazil*

## **Supplementary Information**

Table of contents

Product characterization data -----S1-S3

S1

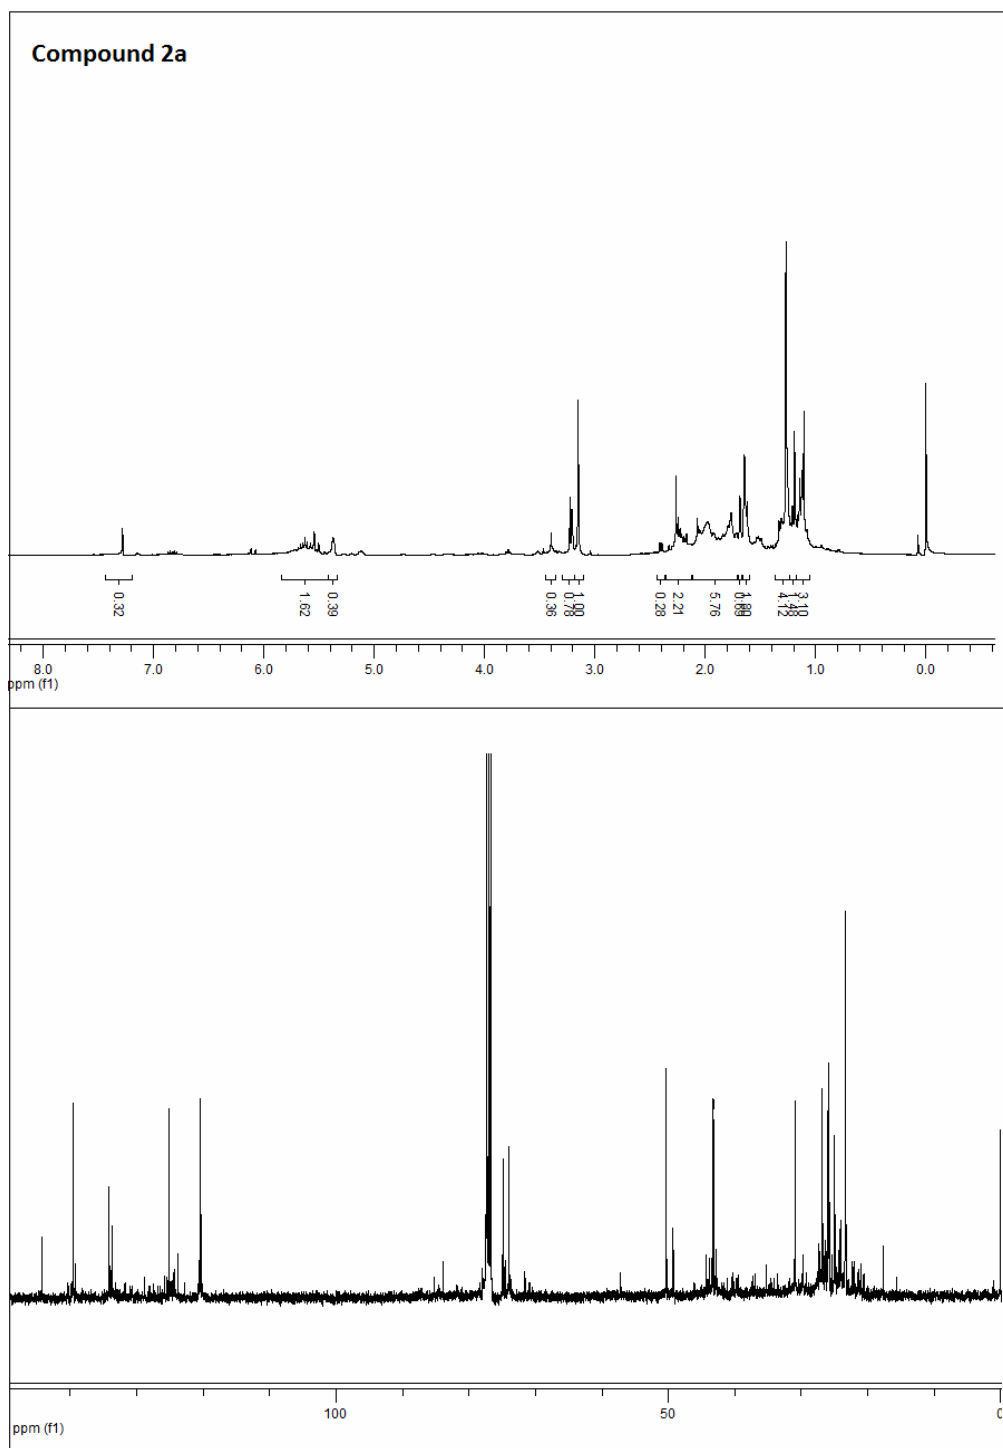

Fig. S1.  $^1\text{H}$  and  $^{13}\text{C}$  spectra of compound 2a

S2

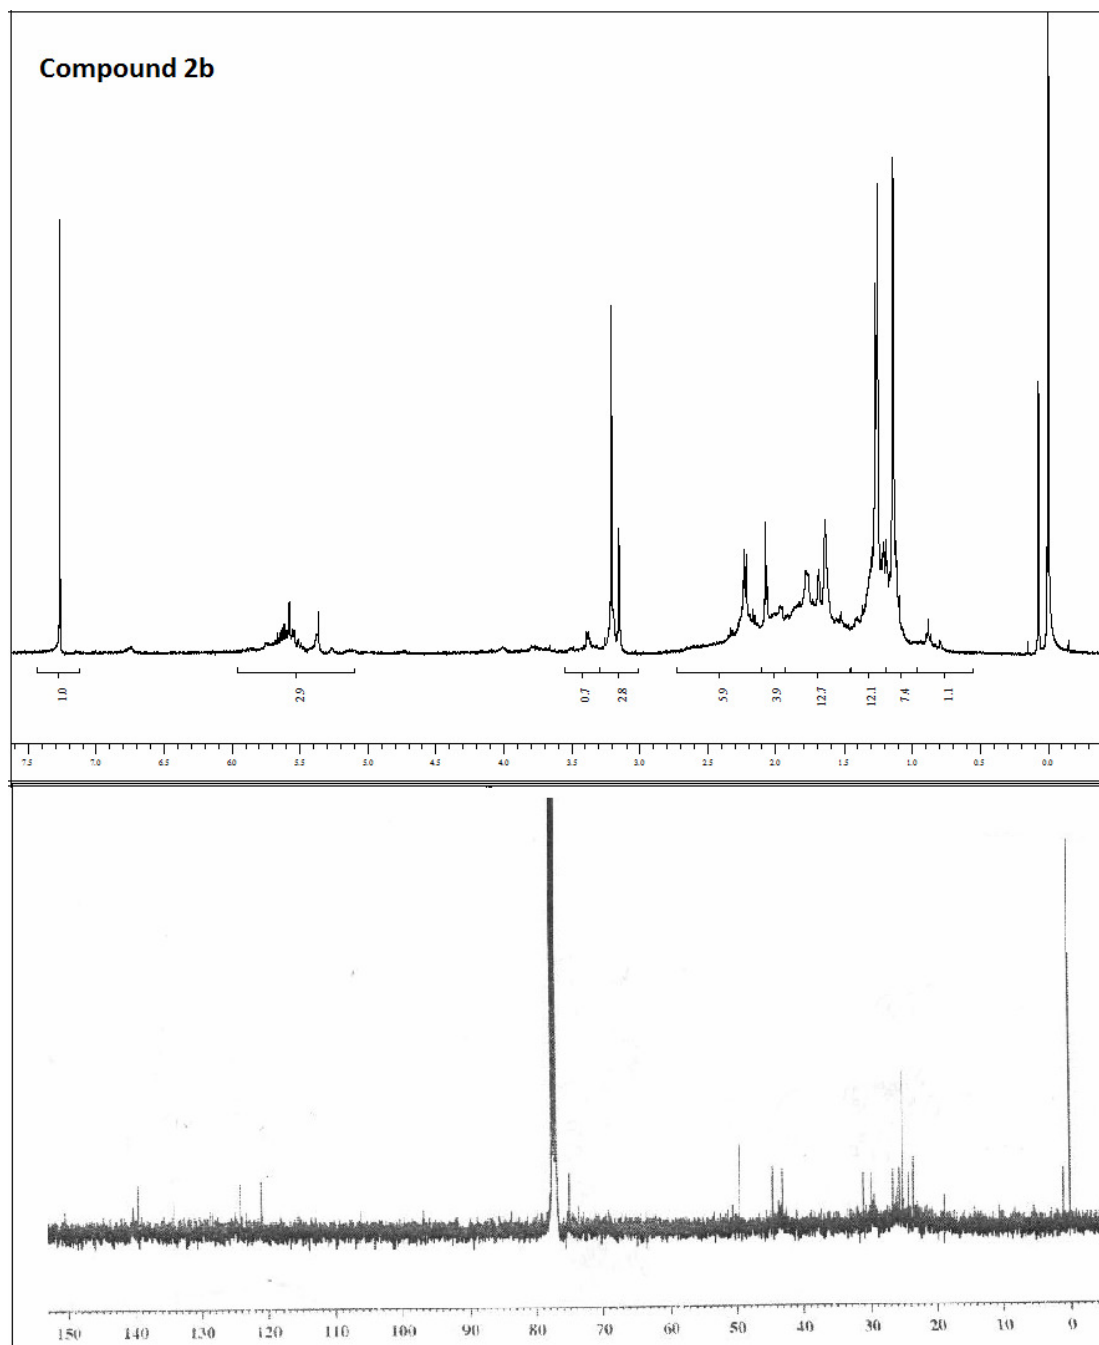

Fig. S2.  $^1\text{H}$  and  $^{13}\text{C}$  spectra of compound 2b

S3

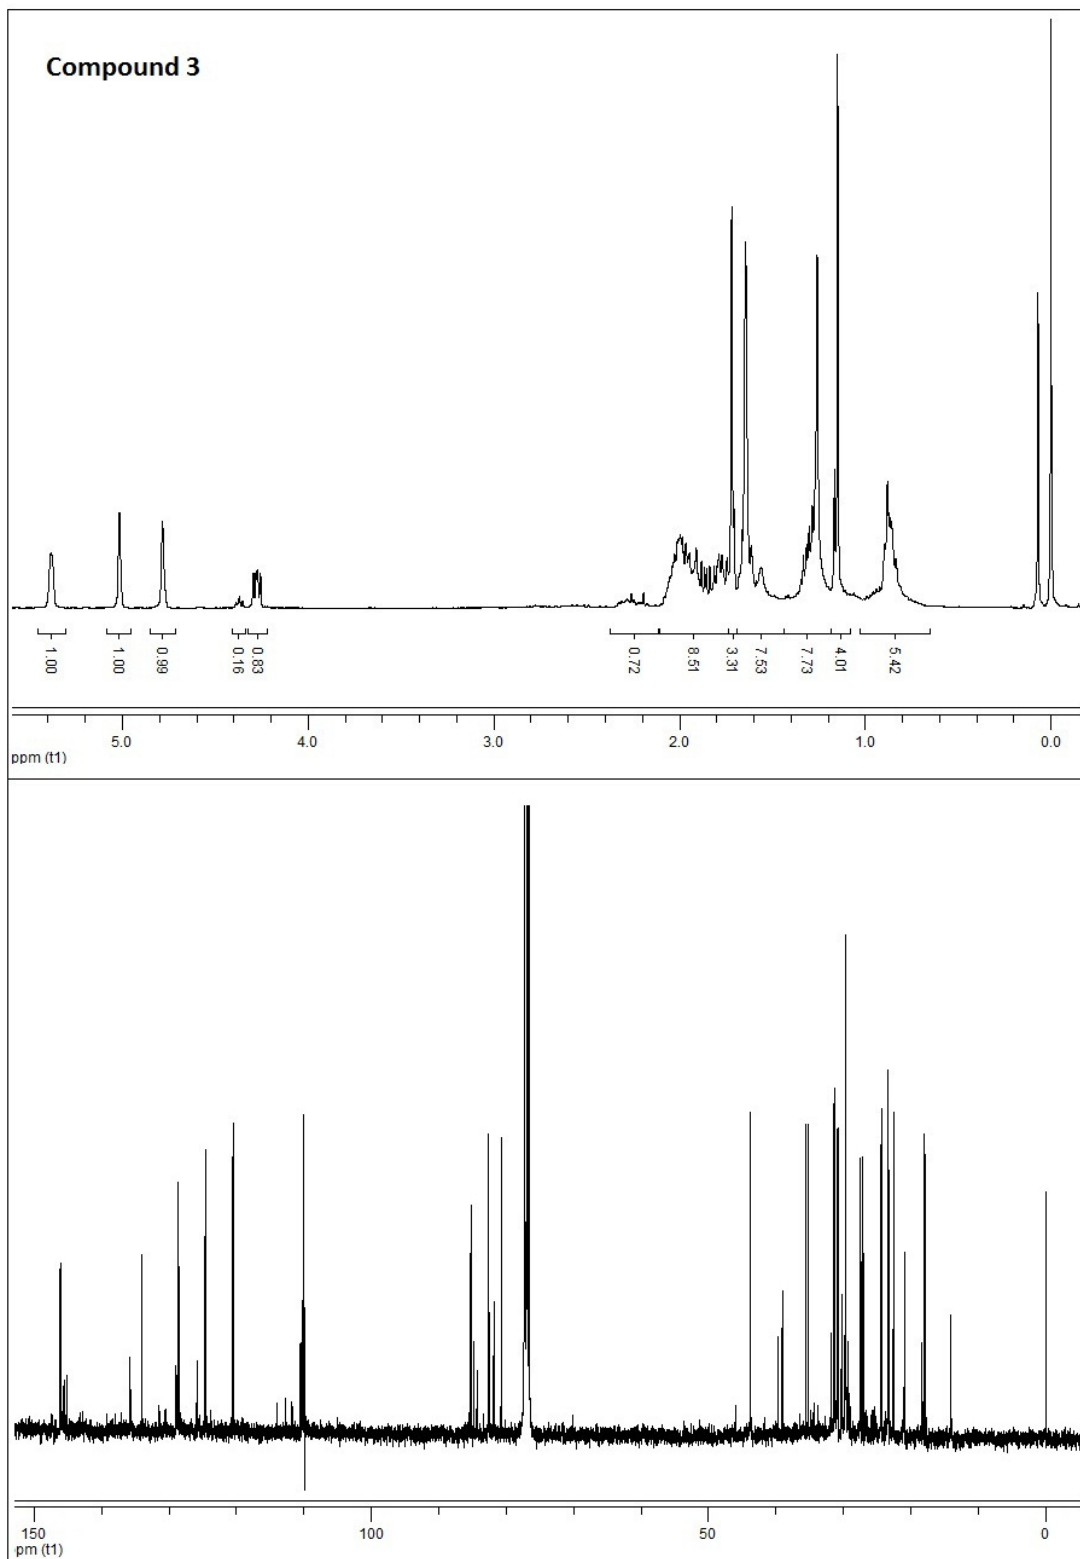

Fig. S3.  $^1\text{H}$  and  $^{13}\text{C}$  spectra of compound 3
